# Supplementary material
Source: PubMed Central journal article supplement (PMC5479602)
Supplement: 18970e58a85f5e50a4a6cc153fc649dd_2016_146746-Disclosures_and_Contributions.pdf [file 18970e58a85f5e50a4a6cc153fc649dd_2016_146746-Disclosures_and_Contributions.pdf]

Haematologica  
HAEMATOL/2016/146746  
Version 3

Revealing Eltrombopag's promotion of human megakaryopoiesis  
through AKT/ERK-dependent pathway activation

Christian A. Di Buduo, Manuela Currao, Alessandro Pecci, David L.  
Kaplan, Carlo L. Balduini, and Alessandra Balduini

Disclosures: None.

Contributions: Alessandra Balduini, Carlo L. Balduini: conceived the idea, supervised the project and wrote the manuscript; Christian A Di Buduo: designed and performed the experiments, analyzed the data and wrote the manuscript; Manuela Currao: performed the experiments and analyzed the data; Alessandro Pecci, David L. Kaplan: analysed the data and edited the manuscript.
